# Supplementary material for: The UFM1 E3 ligase recognizes and releases 60S ribosomes from ER translocons
Source: PubMed Central journal article supplement (PMC10937380; doi:10.1038/s41586-024-07093-w), 2024-02-21

### **Source Data Figure 1: Uncropped gel scans from Main Figures**

**a**, Immunoblots (from Figure 1a) analysing UFMylation of 60S and 80S ribosomes obtained from sucrose density gradient of membrane fractions from WT Flp-In 293 T-REx cells. Three different gels were run and respective membranes were probed for UFM1, RPL26 and RPS6, respectively.

**b**, Immunoblots (from Figure 4c) showing *in vitro* UFMylation of 60S ribosomes in the presence of indicated UFC1 mutants that are defective in E3 binding. Samples were run on two separate SDS-PAGE gels and transferred onto two different membranes. Membrane 1 was probed for RPL26 and membrane 2 was probed for UFC1, respectively.

**c**, Coomassie-stained SDS-PAGE gel under non-reducing conditions (from Figure 4d) showing lysine discharge assays in the presence of E3<sub>mUU</sub> bearing truncations (UFL1 $\Delta$ 21-24 and UFL1 $\Delta$ 25-28) in the hinge region.

**d**, Coomassie-stained SDS-PAGE gels (from Figure 4e) showing SEC fractions of UFL1- $\Delta\alpha$ 1/UFBP1/UFC1-UFM1, UFL1- $\Delta\alpha$ 1/UFBP1/CDK5RAP3 and UFL1- $\Delta\alpha$ 1/UFBP1/CDK5RAP3/UFC1-UFM1.

**e**, Immunoblots from Figure 5b analysing 60S ribosomal fractions from sucrose density gradient fractionation of parental WT and CDK5RAP3 KO cells. Samples were run on three different SDS-PAGE gels. Membrane 1 was probed for SEC61 $\beta$  and membrane 2 was probed for RPL26. Membrane 3 was first probed for RPL10a and then re-probed for UFM1.

Figure 1a

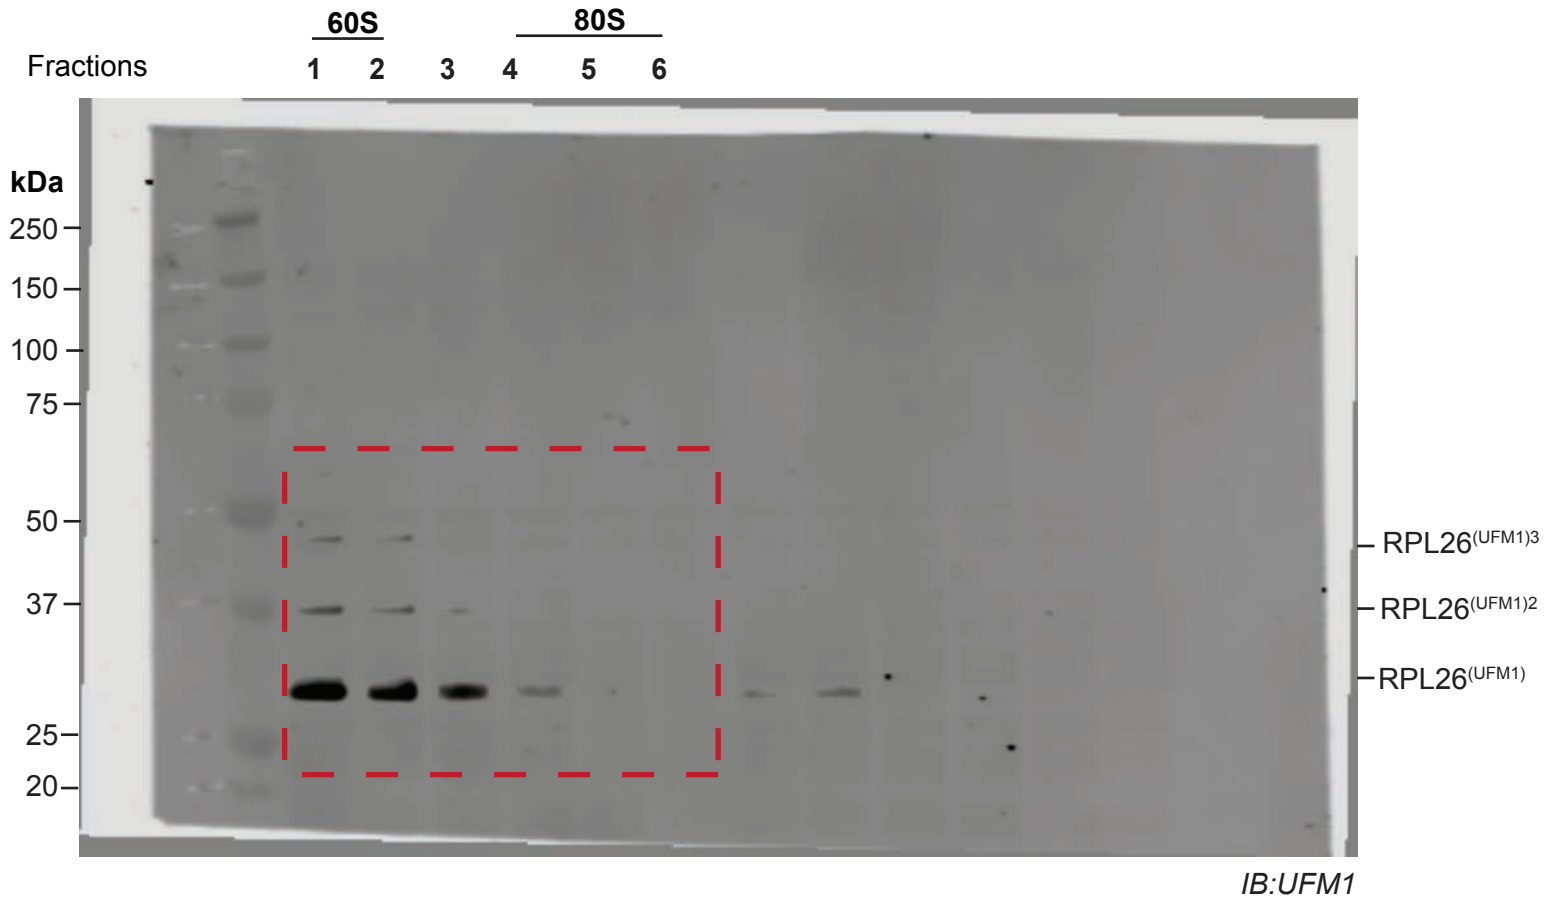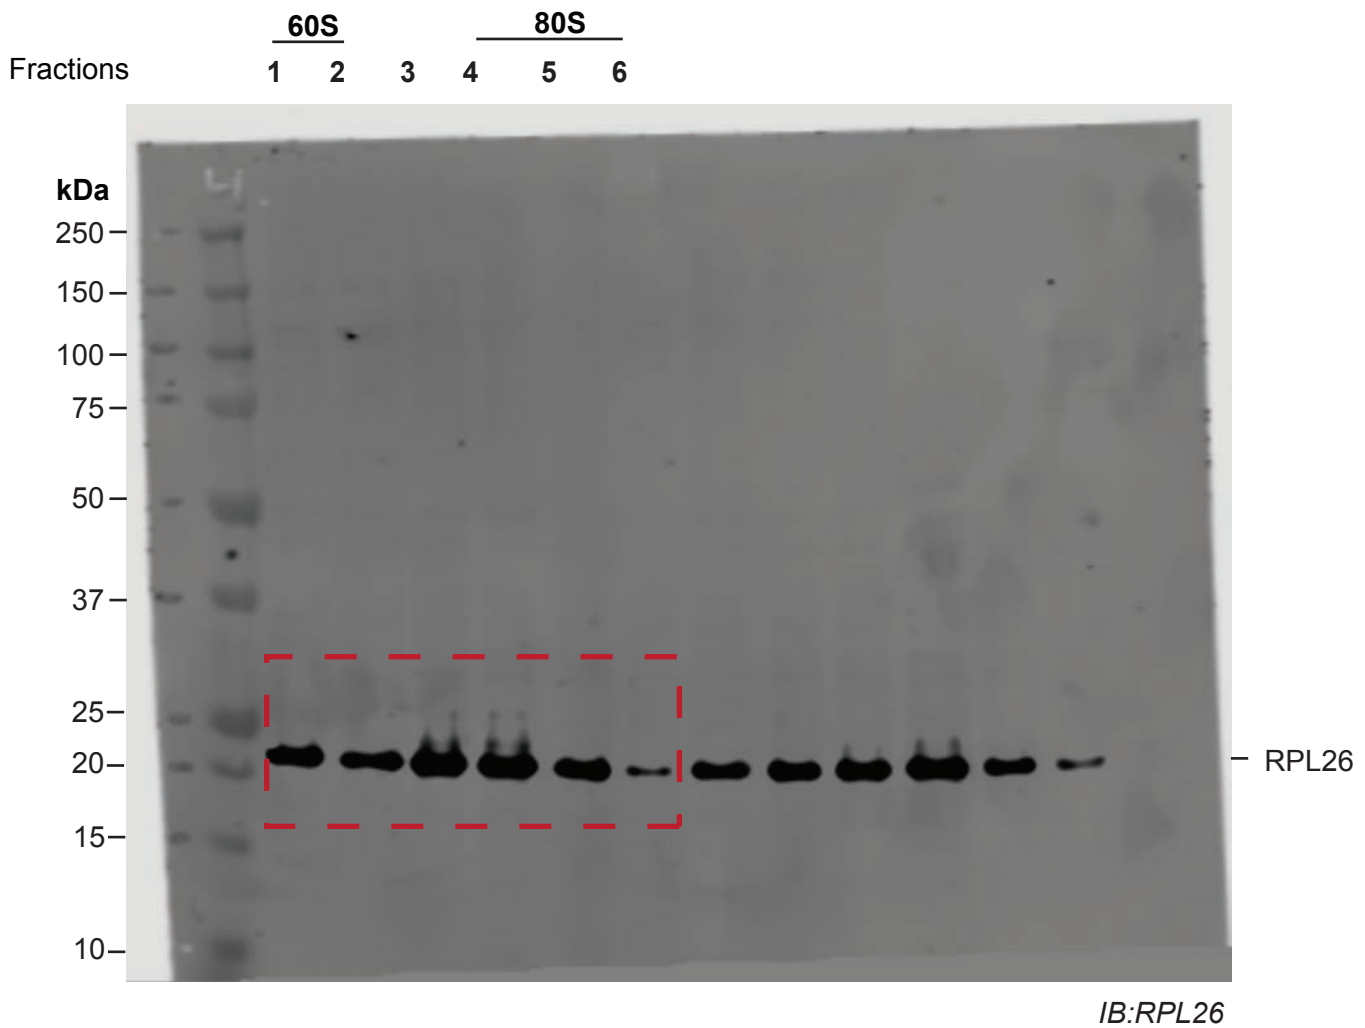

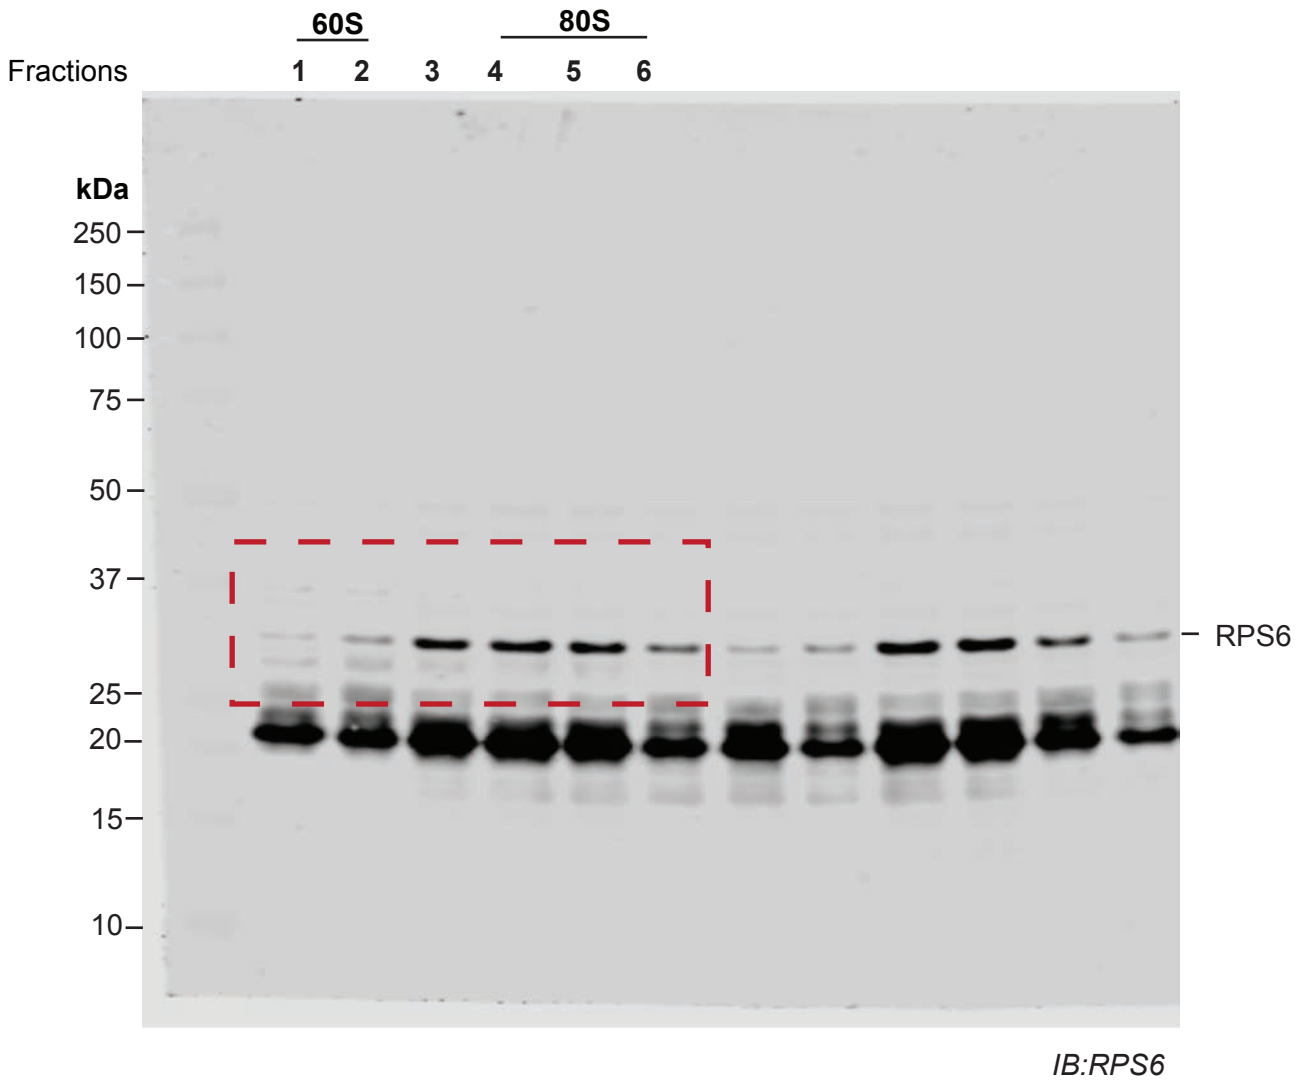

**b**

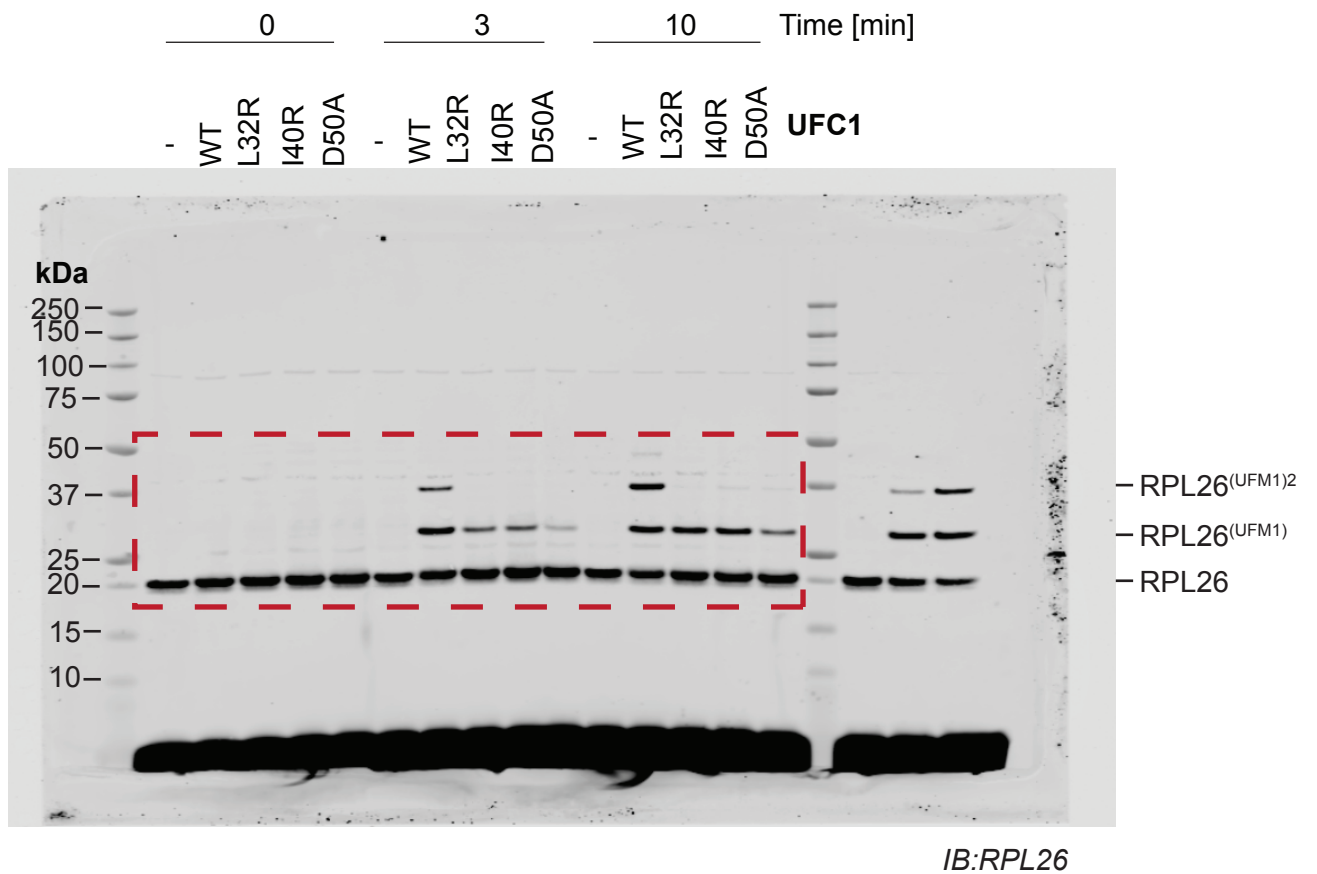

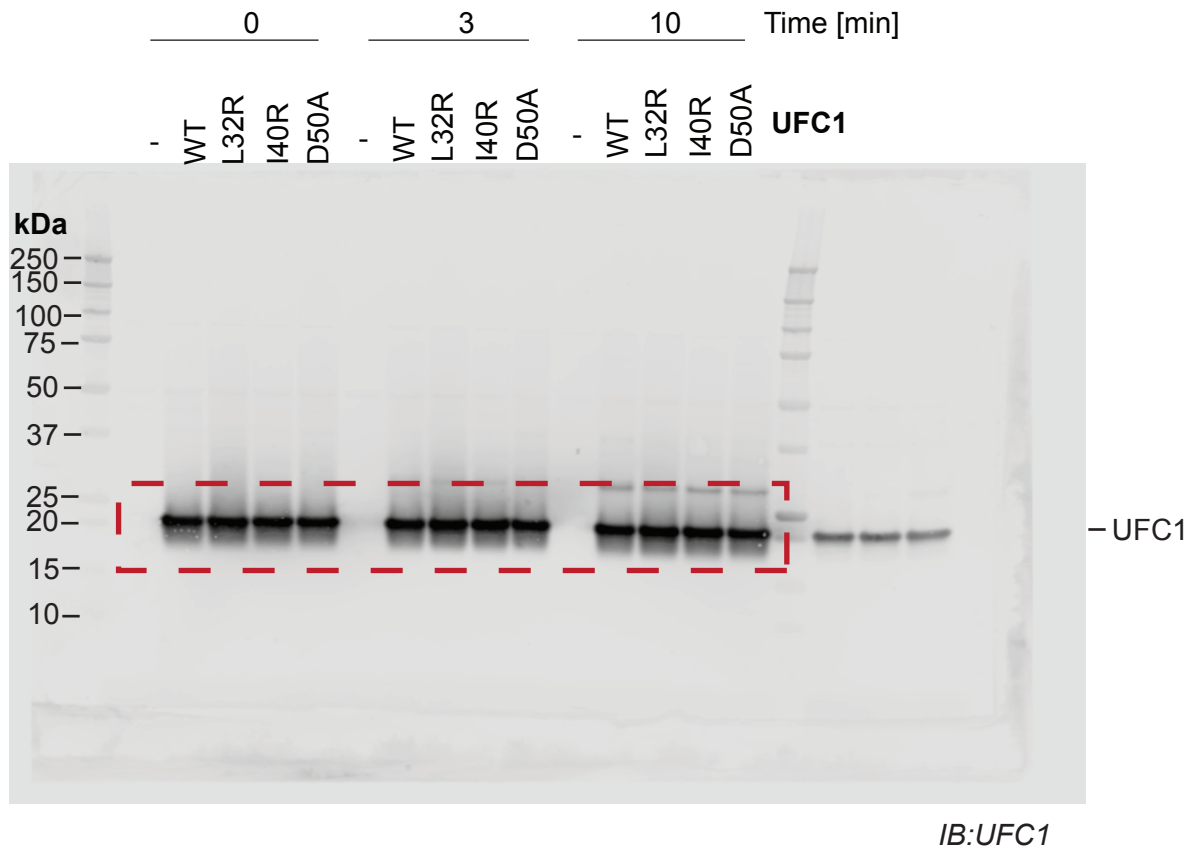

**c**

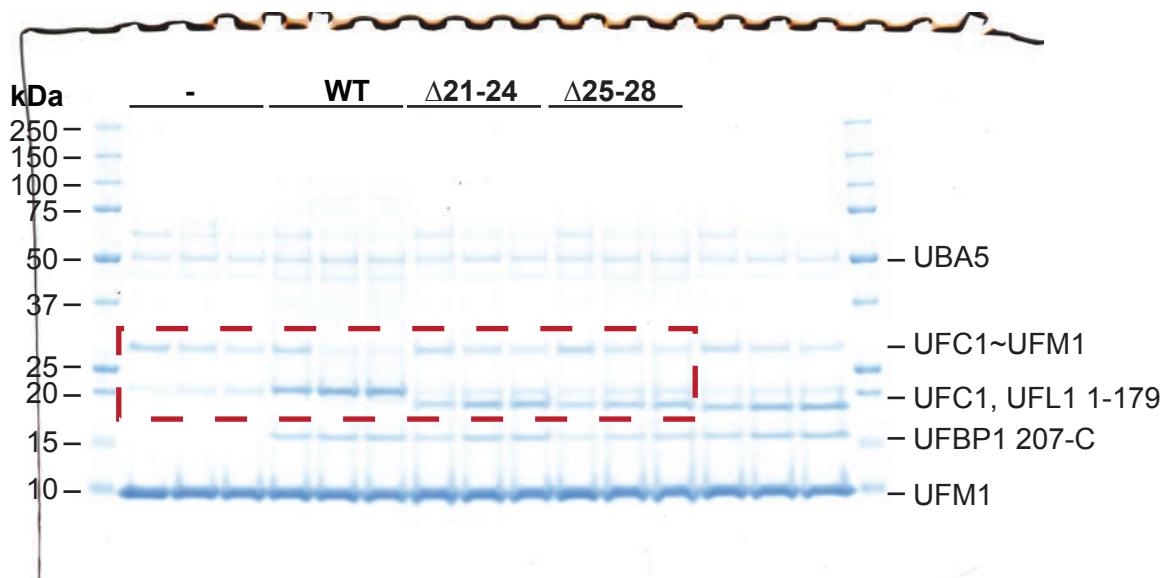

d

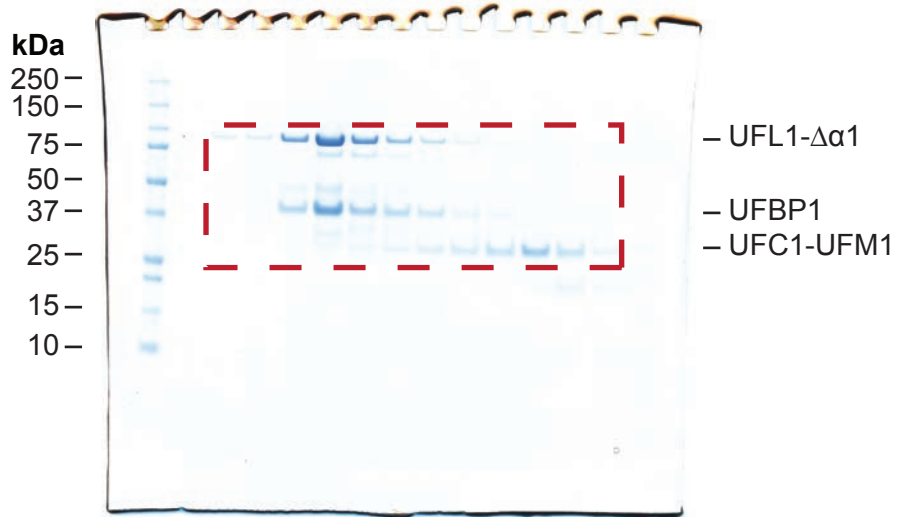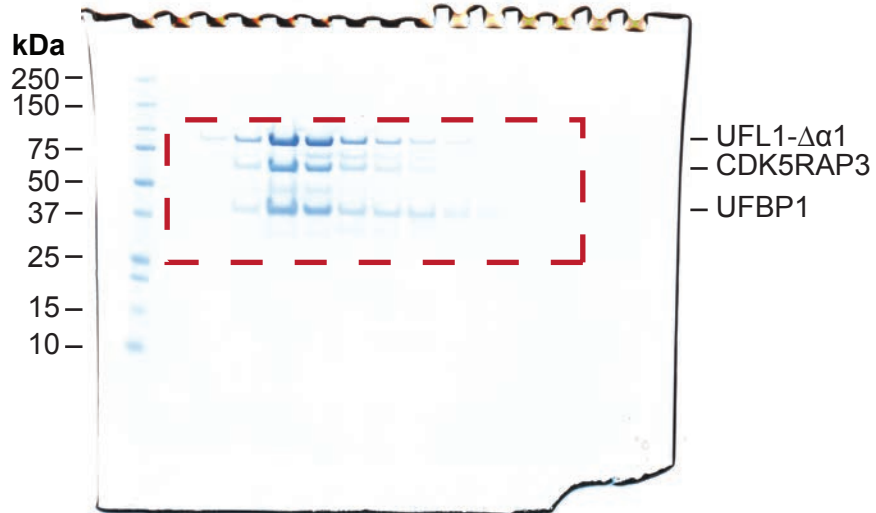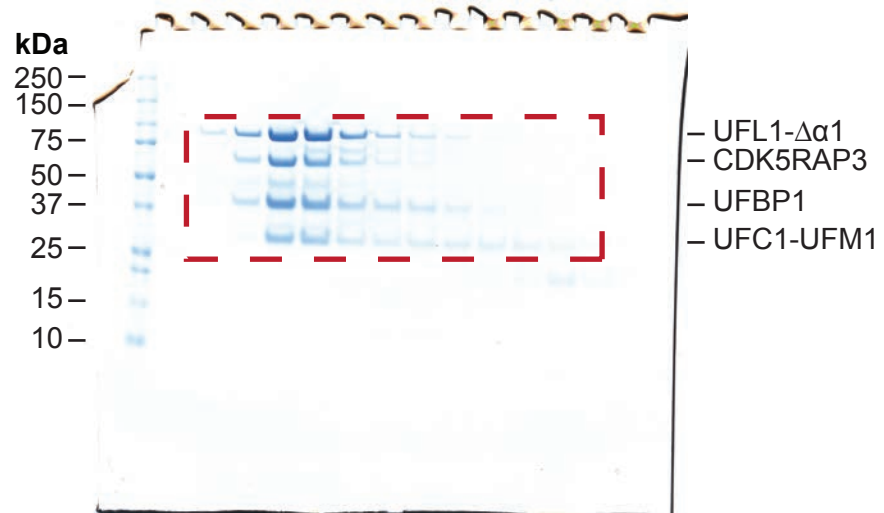

e

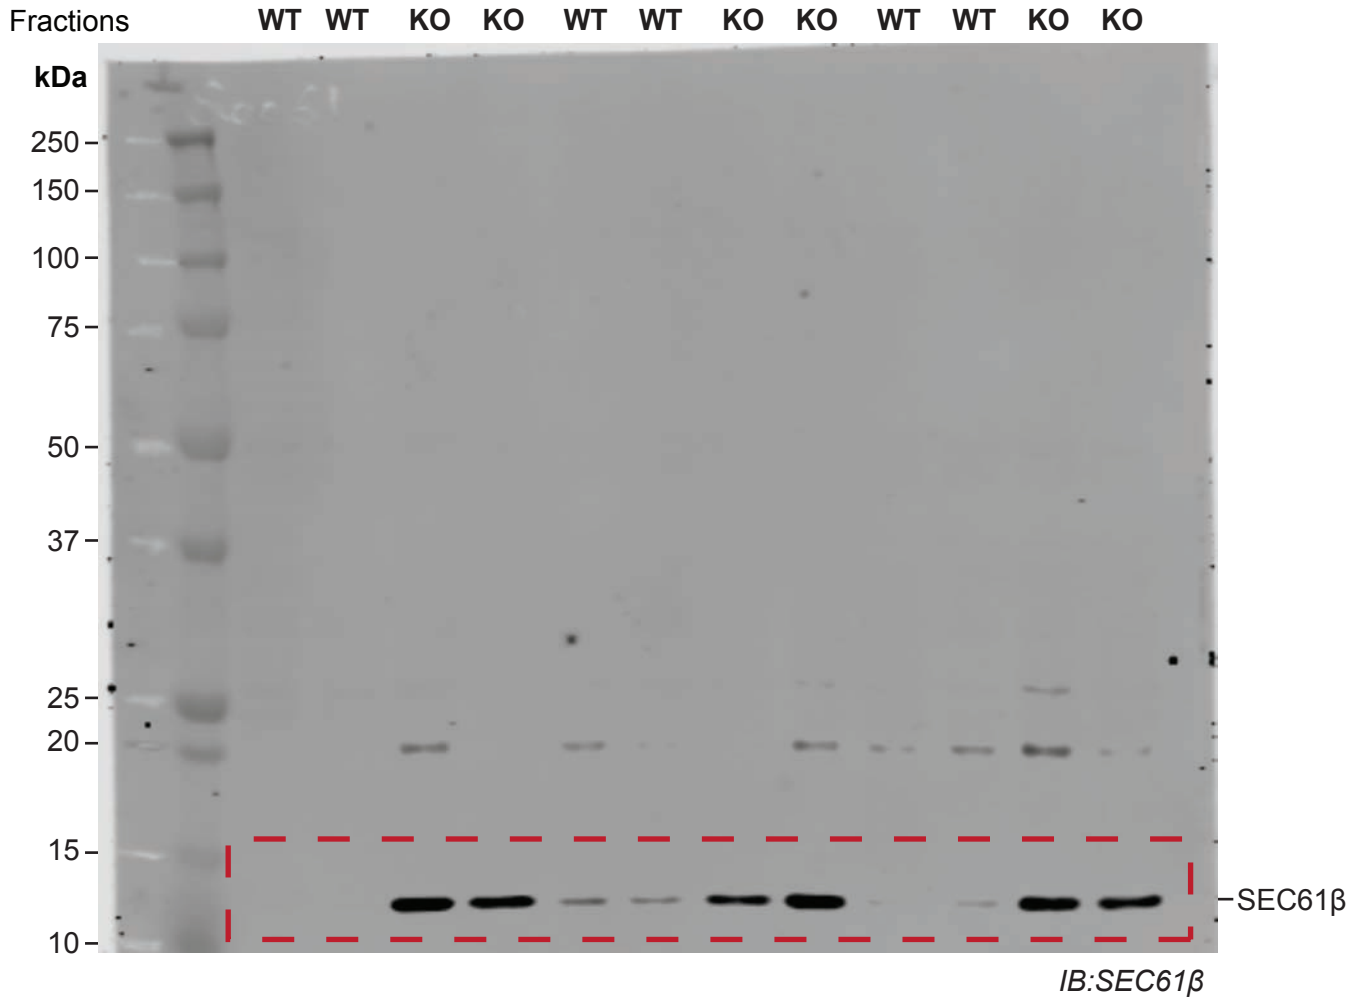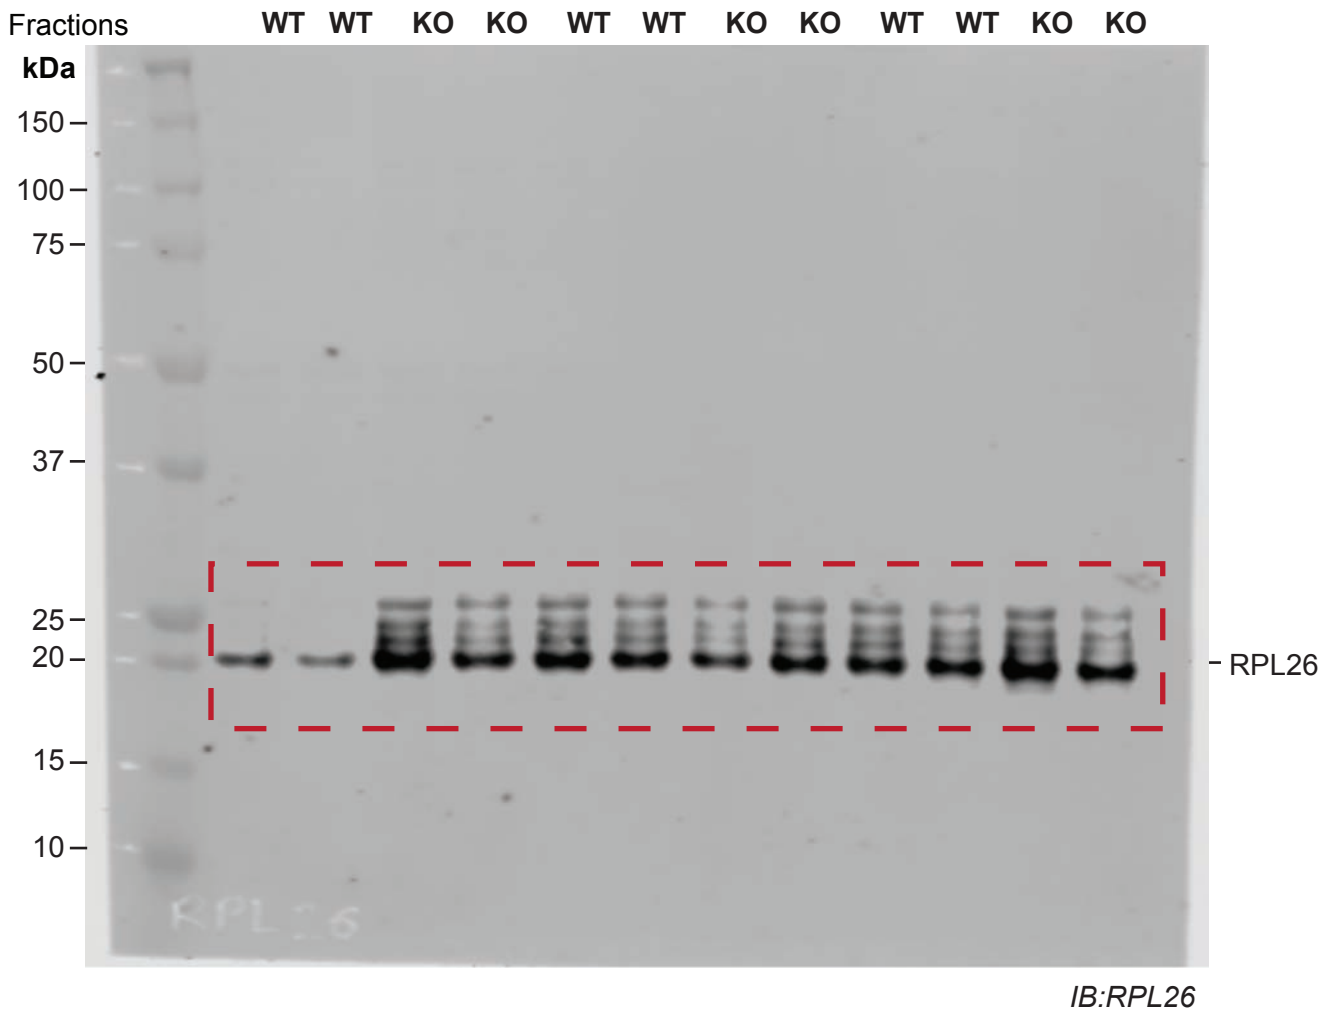

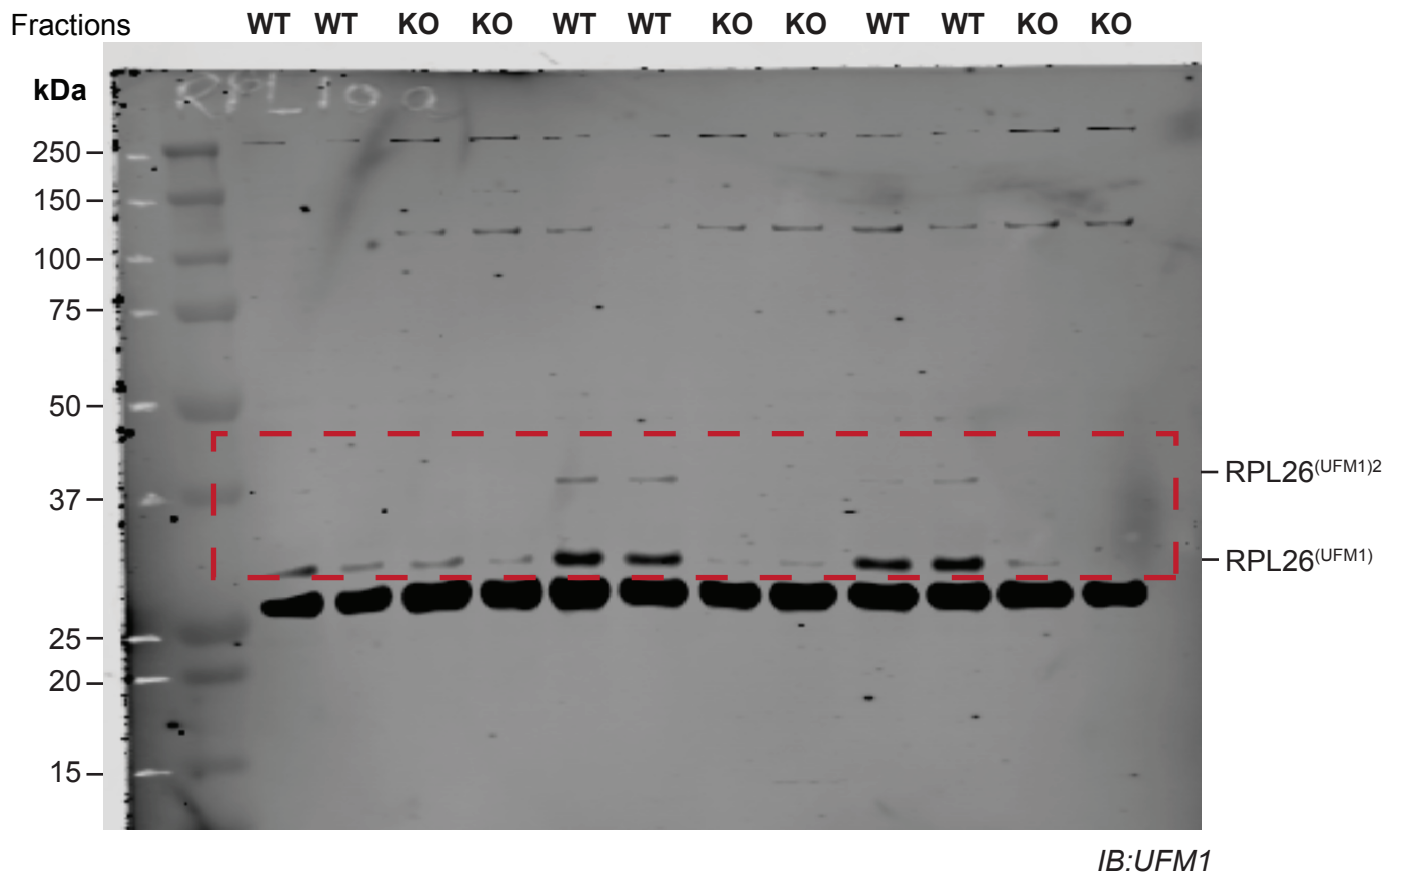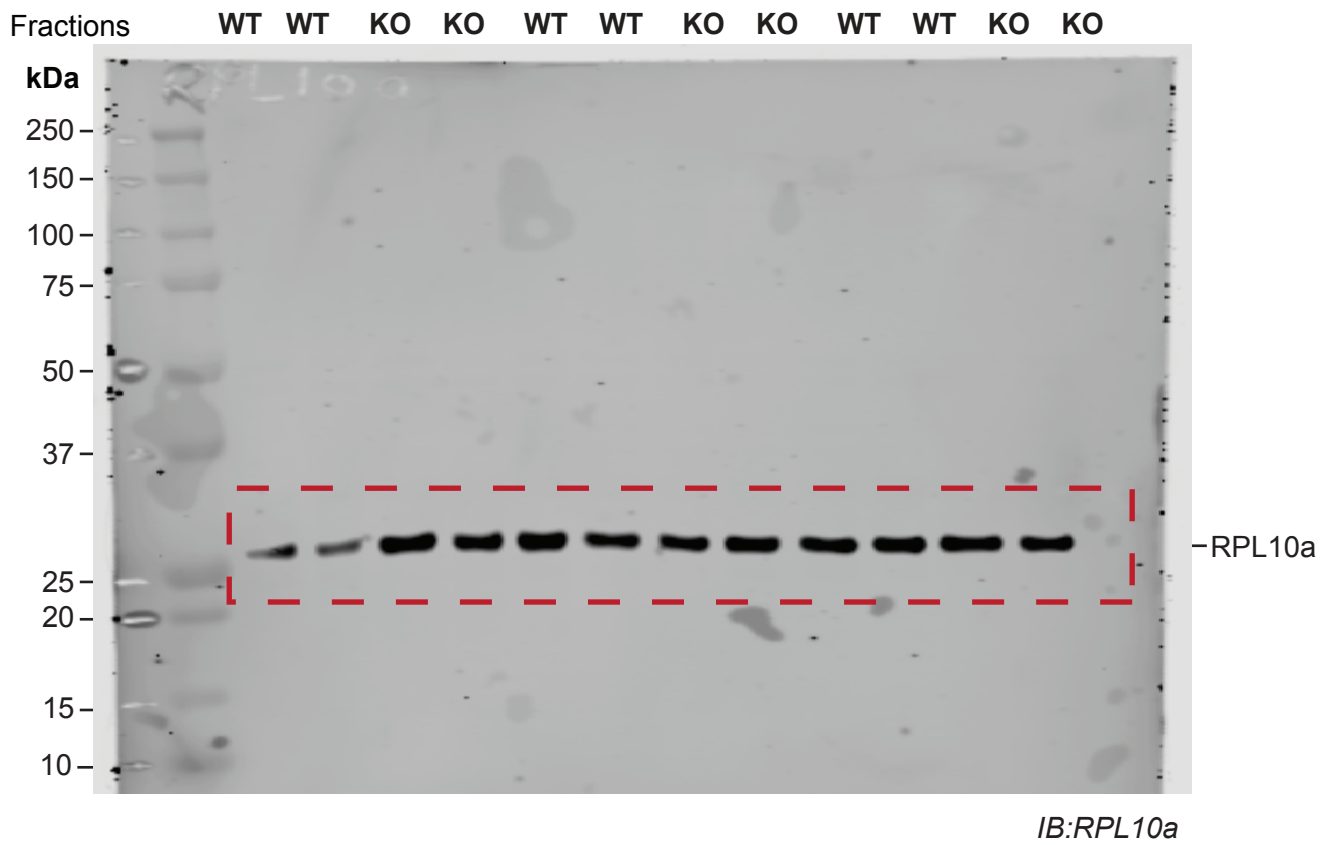

Supplement: 41586_2024_7093_MOESM6_ESM.pdf [file 41586_2024_7093_MOESM6_ESM.pdf]
