# Supplementary material for: The UFM1 E3 ligase recognizes and releases 60S ribosomes from ER translocons
Source: PubMed Central journal article supplement (PMC10937380; doi:10.1038/s41586-024-07093-w), 2024-02-21
Supplement: 41586_2024_7093_MOESM1_ESM.pdf [file 41586_2024_7093_MOESM1_ESM.pdf]

---

**Supplementary information**

---

**The UFM1 E3 ligase recognizes and releases  
60S ribosomes from ER translocons**

---

In the format provided by the  
authors and unedited

**a**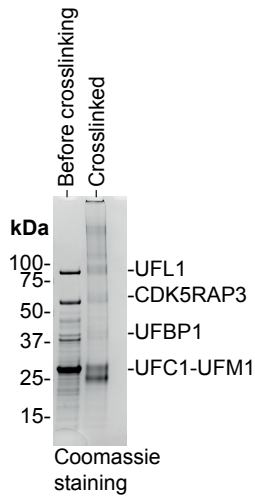**b**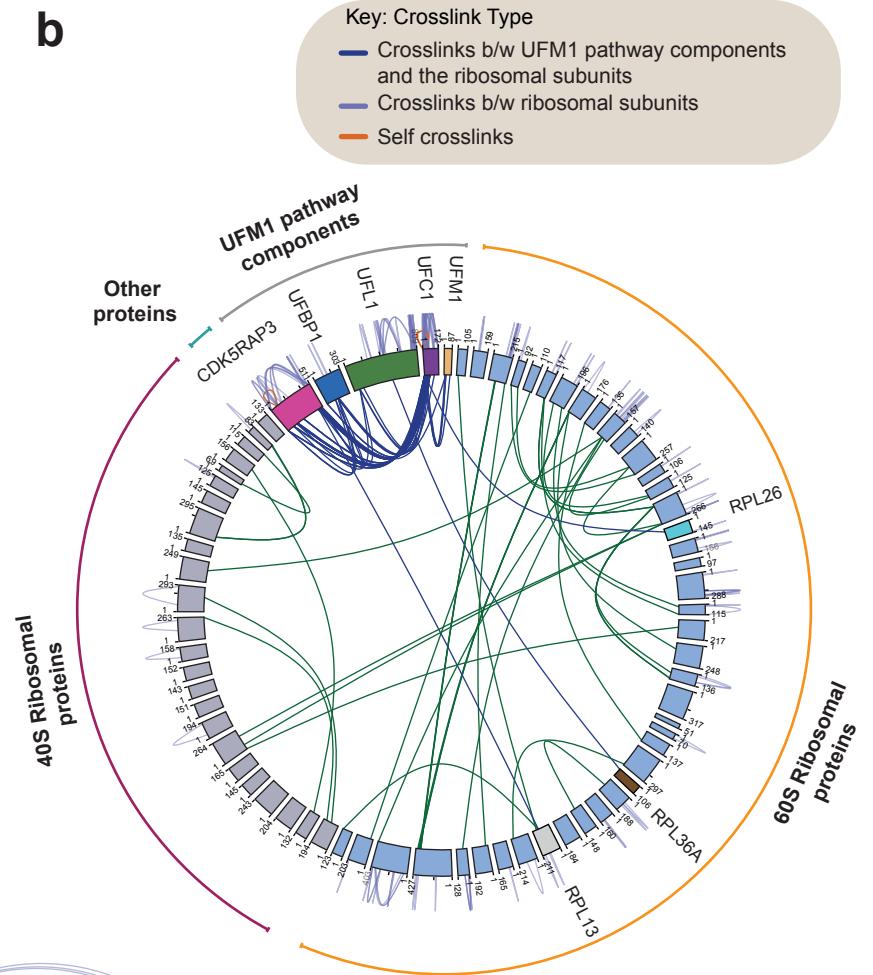**c**

Key: Crosslink Type

- Intermolecular crosslinks
- Intramolecular crosslinks
- Self crosslinks

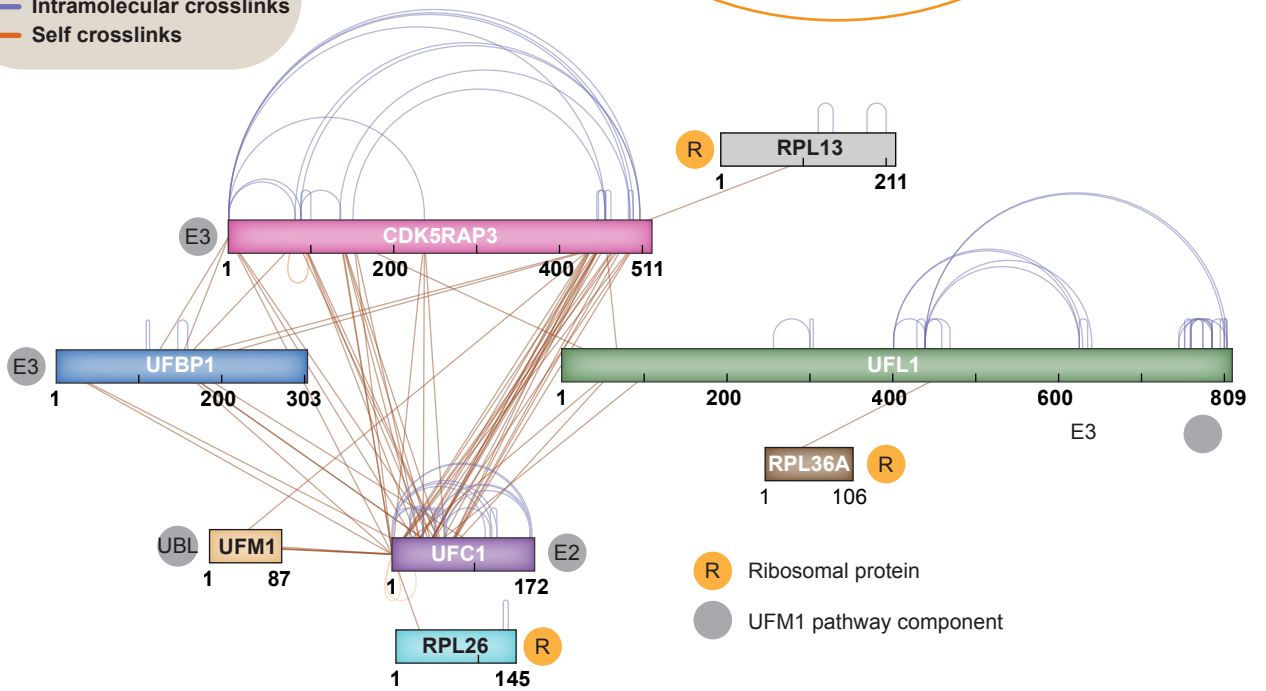**d**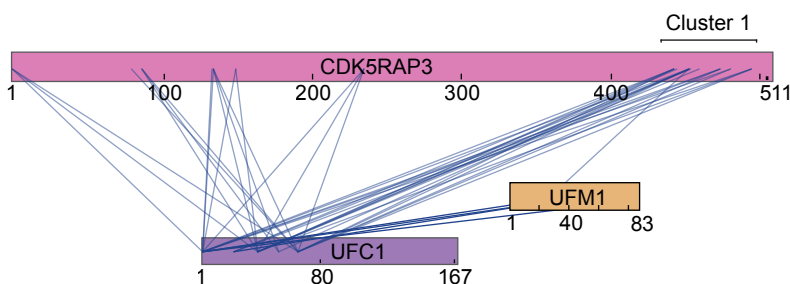

### **Supplementary Figure 1 Summary of crosslinking-MS data**

**a**, Coomassie-stained SDS-PAGE gel analysing formation of UREL-ribosome complexes in the presence and absence of the crosslinker disuccinimidyl dibutyric urea (DSBU). The protein complexes were incubated with DSBU for 30 min at 23 °C. The crosslinking reaction was quenched by adding excess Tris (pH 8) and run on a 4-12% SDS-PAGE gel followed by Coomassie staining. **b**, Circular plot showing crosslinks formed between UREL, UFC1-UFM1 and ribosomal subunits. The ligase components specifically interact with the 60S ribosomal subunits. **c**, Crosslinks between UREL, UFC1-UFM1 and the ribosomal subunits derived from above are shown to highlight the interaction network. **d**, Schematic showing intermolecular crosslinks between UFC1, UFM1 and CDK5RAP3 identified by crosslinking mass spectrometry (XL-MS).

**Supplementary Table 1. Details of antibodies and recombinant proteins**

| <b>Antibodies and dilution used</b>             |                           |             |
|-------------------------------------------------|---------------------------|-------------|
| Anti-UFM1 (1:1000)                              | Abcam                     | ab109305    |
| Anti-UBA5 (1:1000)                              | Universal Biologicals     | A304-115A-T |
| Anti-UFC1 (1:1000)                              | Abcam                     | ab189252    |
| Anti-UFL1 (1:1000)                              | Abcam                     | ab227506    |
| Anti-CDK5RAP3 (1:1000)                          | Bethyl Laboratories       | A300-870A   |
| Anti-rabbit IgG, HRP-linked Antibody (1:10,000) | CST                       | 70745       |
| IRDye 800CW anti-Rabbit (1:10,000)              | Li-COR                    | 926-32211   |
| IRDye 680CW anti-Rabbit (1:10,000)              | Li-COR                    | 926-68071   |
| Anti-UFBP1 (DDRKG1) (1:1000)                    | Proteintech               | 21445-1-AP  |
| Anti-UFSP2 (1:1000)                             | Abcam                     | ab192597    |
| Anti-RPL26 (1:1000)                             | Abcam                     | ab59567     |
| Anti-ERp72 (1:1500)                             | CST                       | 5033T       |
| Anti-GAPDH (1:5000)                             | Abcam                     | ab8245      |
| Anti-RPS10 (1:1000)                             | Abcam                     | ab151550    |
| Anti-RPL10A (1:5000)                            | Abcam                     | ab174318    |
| Anti-ODR4 (1:1000)                              | Abcam                     | Ab121495    |
| <b>Recombinant proteins</b>                     |                           |             |
| 6xHis-TEV-UFL1/StrepII-UFBP1 29-C K193A         | This Study                | DU76181     |
| 6xHis-TEV-UFL1 /StrepII-UFBP1 29-C F196A        | This Study                | DU76182     |
| 6xHis-TEV-UFL1 /StrepII-UFBP1 29-C K193D        | This Study                | DU76187     |
| 6xHis-TEV-UFL1 StrepII-UFBP1 29-C V198R         | This Study                | DU76188     |
| 6xHis-TEV-UFL1 /StrepII-UFBP1 29-C F196R        | This Study                | DU76190     |
| 6xHis-TEV-UFL1 /StrepII-UFBP1 29-C              | Peter et al. <sup>3</sup> | DU63479     |
| 6xHis-3C-UFM1 1-83                              | Peter et al. <sup>3</sup> | DU59441     |
| 6xHis-3C-UFM1 1-83 K69R                         | Peter et al. <sup>3</sup> | DU59446     |
| 6xHis-3C-UFM1 1-83 K0                           | Peter et al. <sup>3</sup> | DU59472     |
| GST-3C-UFBP1 178-204                            | This Study                | DU75665     |
| GST-3C-UFC1                                     | This Study                | DU73281     |
| GST-3C-UFC1 L32R                                | This Study                | DU75492     |
| GST-3C-UFC1 I40R                                | This Study                | DU75493     |
| GST-3C-UFC1 D50A                                | This Study                | DU75504     |

|                                             |                            |         |
|---------------------------------------------|----------------------------|---------|
| GST-3C-UFC1 C116K                           | This Study                 | DU73986 |
| 6xHis-TEV-UFM1 1-83                         | This Study                 | DU73256 |
| 6xHis-UFL1 1-179/UFBP1 207-C                | This Study                 | DU72757 |
| 6xHis-UFL1 1-179 I8R/UFBP1 207-C            | This Study                 | DU75507 |
| 6xHis-UFL1 1-179 L11R/UFBP1 207-C           | This Study                 | DU75508 |
| 6xHis-UFL1 1-179 F15R/UFBP1 207-C           | This Study                 | DU75509 |
| 6xHis-UFL1 1-179 Q19R/UFBP1 207-C           | This Study                 | DU75505 |
| 6xHis-UFL1 1-179/UFBP1 207-C R265A          | This Study                 | DU75506 |
| 6xHis-UFL1 22-179/Strep-UFBP1 207-C         | This Study                 | DU75115 |
| 6xHis-TEV-UFL1 1-179/UFBP1 174-C            | This Study                 | DU75543 |
| 6xHis-TEV-UFL1 1-179 del21-24/UFBP1 174-C   | This Study                 | DU75672 |
| 6xHis-TEV-UFL1 1-179 del25-28/UFBP1 174-C   | This Study                 | DU75673 |
| 6xHis-TEV-UFL1 1-179/UFC1 C116K-UFBP1 204-C | This Study                 | DU75485 |
| 6xHis-3C-UBA5                               | Peter et. al. <sup>3</sup> | DU32106 |
| 8xHis-MBP-3C-CDK5RAP3                       | Peter et. al. <sup>3</sup> | DU59674 |
